# Supplementary material for: Chemotactic Activity of Cyclophilin A in the Skin Mucus of Yellow Catfish (Pelteobagrus fulvidraco) and Its Active Site for Chemotaxis
Source: PubMed Central journal article supplement (PMC5037701; doi:10.3390/ijms17091422), 2016-08-29
Supplement: ijms-17-01422-s001.pdf [file ijms-17-01422-s001.pdf]

## Supplementary Materials: Chemotactic Activity of Cyclophilin A in the Skin Mucus of Yellow Catfish (*Pelteobagrus fulvidraco*) and Its Active Site for Chemotaxis

Farman Ullah Dawar, Jiagang Tu, Yang Xiong, Jiangfeng Lan, Xing Xing Dong, Xiaoling Liu, Muhammad Nasir Khan Khattak, Jie Mei and Li Lin

**Table S1.** Identified peptides against protein database. Peptide were identified using the protein in the International Protein Index (IPI) (<http://www.ebi.ac.uk/IPI/IPIhelp.html>) database using online MASCOT search engine. The peptides are presented with the reference number and percent identity which they showed with proteins in database.

| Identified Peptides                        | Amino Acid Sequence                                                | Reference Number    | Identity |
|--------------------------------------------|--------------------------------------------------------------------|---------------------|----------|
| Interferon-induced GTP-binding protein Mx1 | K.EISDLIRK.G                                                       | gi 82208280 (2013)  |          |
|                                            | K.GQPENIGEQIK.R                                                    |                     |          |
|                                            | K.EVNEYEEKYR.G                                                     |                     |          |
|                                            | R.EMLQLMQDKNAIDHLLK.E                                              | Q7T2P0 (2016)       | 85%      |
|                                            | K.GFIQLAQNSFLGFPNLLKMAK.T<br>-.MSASLSEQYEEKVRPCIDLIDSLR.A          |                     |          |
| Vasa short form                            | R.EKALGDFR.T                                                       | gi 188529679 (2013) |          |
|                                            | K.LVNSPGMPPK.E                                                     |                     |          |
|                                            | K.VFASTDTRR.G<br>MEDWEDDQSPVVTNTTFDNKESWK.S                        | ACD62526 (2016)     | 100%     |
| Beta-enolase                               | K.FSVVEQEK.I                                                       | gi 308321422 (2013) |          |
|                                            | R.IQQTVEKK.A                                                       |                     |          |
|                                            | K.AGKYDLDFK.S                                                      |                     |          |
|                                            | R.IEEELGDNAY.Y                                                     | ADO27862 (2016)     | 100%     |
|                                            | K.FMLELDGTENK.S<br>K.FMLELDGTENKSK.F<br>R.SGETEDTFIADLVVGLCTGQIK.T |                     |          |
| Recombination activating protein 1         | R.GGGICSFTRTR.V                                                    | gi 382928308 (2013) |          |
|                                            | K.ENVEGAGRQVDLK.L                                                  |                     |          |
|                                            | R.EPEVQGDLESSR.Y<br>R.VPIWKPHNSHCLHCYPK.R                          | AFG29707 (2016)     | 100%     |
| Ism12--like protein A                      | K.DCKWQEK.N                                                        | gi 308322011 (2013) |          |
|                                            | R.DLDQKSVQR.S<br>K.NIVVMDDVVITPPYR.A                               | ADO28143 (2016)     | 100%     |
| Cyclophilin A                              | K.GFGYKGSFHR.V                                                     | gi 318264336 (2013) |          |
|                                            | K.CFAKIVADCGQL                                                     |                     |          |
|                                            | K.HVVFGSVVDGMDVVVR.V<br>K.SIYGKMFADENFTLK.H                        | NP_001187167 (2016) | 100%     |
